# Supplementary material for: Antepartum and labour-related single predictors of non-participation, dropout and lost to follow up in a randomised controlled trial comparing internet-based cognitive–behaviour therapy with treatment as usual for women with negative birth experiences and/or post-traumatic stress following childbirth
Source: HighWire-hosted journal article supplement (doi:10.1136/bmjopen-2022-063214), 2022-11-01
Supplement: bmjopen-2022-063214supp001_data_supplement.pdf [file bmjopen-2022-063214supp001_data_supplement.pdf]

## Supplementary Table 1.

## Week by week content of the iCBT treatment

| Week | Content                                                                          |
|------|----------------------------------------------------------------------------------|
| 1st  | Information, psychoeducation, breathing retraining                               |
| 2nd  | Vignettes, common symptoms, fear and avoidance                                   |
| 3rd  | Depressive symptoms, significance of relationships, “reflective listening”       |
| 4th  | Exposure, talking about the childbirth                                           |
| 5th  | Managing anxiety and depressive symptoms, psychological health, values, recovery |
| 6th  | Summary, repetition and relapse prevention                                       |

*Note.* Every week contained homework assignments based on the content of the module
